# Supplementary material for: Comparative Efficacy of 3% Diquafosol Sodium Eye Drops in Dry Eye Patients Across Age Groups: a Propensity Score-Matched Longitudinal Study
Source: Research Square preprint supplement (doi:10.21203/rs.3.rs-4827759/v1), 2024-10-16
Supplement: Supplementary file 1 [file b514ec90ef21df112b601bc4.docx]

**Research Protocol**

1.Project Summary

This study aims to evaluate the efficacy of 3% diquafosol sodium eye drops in treating dry eye disease (DED) across different age groups using a propensity score-matched longitudinal design. Participants were divided into two age groups: younger (<40 years) and older (≥40 years). Propensity score matching (PSM) was applied at a 1:1 ratio to ensure comparable baseline characteristics between groups. All participants received 3% diquafosol sodium eye drops six times daily for 3 months. The clinical metrics assessed included Dry Eye Questionnaire Score (DEQS), Fluorescein Break-Up Time (FBUT), Tear Meniscus Height (TMH), Schirmer I test, Lipid Layer Thickness, Logarithm of the Minimum Angle of Resolution (LogMAR), Intraocular Pressure (IOP), and Meibomian Gland Loss Area (MGLA). The study found significant improvements in DEQS, FBUT, and TMH over time in both age groups, indicating that the efficacy of diquafosol sodium is consistent across different age demographics. These results support the use of diquafosol sodium eye drops in a broad demographic of patients with DED.

2.General Information

2.1Protocol Title: Comparative Efficacy of 3% Diquafosol Sodium Eye Drops in Dry Eye Patients Across Age Groups: A Propensity Score-Matched Longitudinal Study

2.2Sponsor/Funder*: Tianjin Eye Hospital, Projects of Tianjin Eye Hospital (YKZD 2002), Bethune Dry Eye Treatment and Research Project (GY2021019J), and other associated projects.

2.3Investigators:

Yi Dong- Data collection, analysis, manuscript preparation.

Zecheng Li - Data collection, analysis, manuscript revision.

Luxia Chen- Project oversight, study design, manuscript editing.

2.4Research Sites:

Tianjin Eye Hospital- Tianjin Key Lab of Ophthalmology and Visual Science, Nankai University Affiliated Eye Hospital, Gansu Road 4, Tianjin, 300020, China.

3.Rationale & Background Information

Dry eye disease (DED) is a prevalent condition that significantly impacts the quality of life. Age-related decline in ocular surface health necessitates tailored treatment strategies. Diquafosol tetrasodium, a P2Y2 receptor agonist, has been shown to enhance tear film stability by promoting the secretion of aqueous, mucin, and lipid components. Given the age-related changes in ocular surface functionality, this study evaluates the efficacy of 3% diquafosol sodium eye drops across different age groups to inform optimal DED management.

4.Study Goals and Objectives

4.1Primary Goal: To determine whether age influences the efficacy of 3% diquafosol sodium eye drops in treating DED.

4.2Primary Objective: To evaluate the changes in DEQS, FBUT, and TMH over time across different age groups.

4.3Secondary Objectives: To assess other ocular health metrics such as Schirmer I, LogMAR, IOP, and MGLA in response to the treatment.

5.Study Design

This is a longitudinal, prospective, clinical trial using a propensity score-matched design. The study enrolled 100 DED patients, divided into younger (<40 years) and older (≥40 years) groups. The study assessed clinical metrics at baseline (V1), 1 month (V2), and 3 months (V3).

6.Methodology

Participants received 3% diquafosol sodium eye drops (one drop, six times daily) for 3 months. Follow-up visits included assessments of DEQS, FBUT, TMH, and other ocular metrics. Statistical analyses, including mixed-effects models, were used to evaluate longitudinal changes in clinical metrics.

7.Safety Considerations**

The protocol ensured participant safety by monitoring and reporting adverse events throughout the study. Ethical approval was obtained, and informed consent was provided by all participants.

8.Follow-up

Participants were followed up at 1 month and 3 months after treatment initiation. Follow-up included assessments of ocular health metrics and monitoring for adverse events.

9.Data Management and Statistical Analysis

Data were managed using standardized methods. Statistical analyses were conducted using R, with PSM applied to ensure baseline comparability. Longitudinal data were analyzed using mixed-effects models.

10.Quality Assurance

The study adhered to Good Clinical Practice (GCP) standards, with regular monitoring to ensure data integrity and participant safety.

11.Expected Outcomes of the Study

The study is expected to demonstrate that 3% diquafosol sodium eye drops are effective across different age groups, providing insights for clinicians in managing DED.

12.Dissemination of Results and Publication Policy

Results will be disseminated through scientific publications and presentations at relevant conferences. The lead investigator will oversee publication efforts, with contributions acknowledged as appropriate.

13.Duration of the Project

The study was conducted over a period of 2 years, with a detailed timeline provided for each phase.

14.Problems Anticipated

Potential challenges include participant adherence to the treatment regimen and variability in response metrics. Strategies to mitigate these challenges include regular follow-ups and robust statistical controls.

15.Project Management

Each team member’s role is clearly defined, with Yi Dong leading data collection and analysis, Zecheng Li contributing to data analysis and manuscript revision, and Luxia Chen providing project oversight and manuscript editing.

16.Ethics

Ethical considerations were thoroughly addressed, with informed consent obtained from all participants. The study was conducted in accordance with the Declaration of Helsinki.

17.Informed Consent Forms

Approved informed consent forms were provided in English and Chinese, tailored to the participant groups involved.
